# Supplementary material
Source: ML conference proceedings conference paper supplement (https://proceedings.mlr.press/v32/lian14.html)
Supplement: Supplementary file 1 [file lian14-supp.pdf]

---

# Appendix for "Modeling multiple event streams with latent semi-Markov processes"

---

**Wenzhao Lian**

WL89@DUKE.EDU

Department of Electrical and Computer Engineering, Duke University, Durham, NC 27708, USA

**Vinayak Rao**

VAR11@STAT.DUKE.EDU

Department of Statistical Science, Duke University, Durham, NC 27708, USA

**Brian Eriksson**

BRIAN.ERIKSSON@TECHNICOLOR.COM

Technicolor Research Center, 735 Emerson Street, Palo Alto, CA 94301, USA

**Lawrence Carin**

LCARIN@DUKE.EDU

Department of Electrical and Computer Engineering, Duke University, Durham, NC 27708, USA

## 1. Graphical model

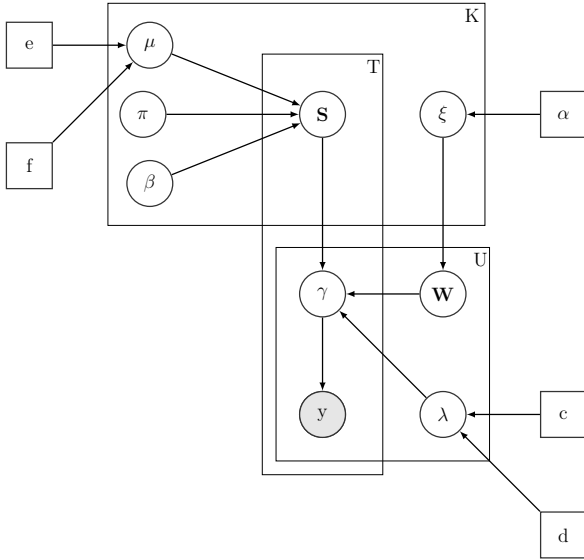

Figure 1. The graphical representation of the proposed model

## 2. Generative process for bsMJP

---

**Algorithm 1** Generative process for a  $K$ -dimensional bsMJP path in  $[0, T]$

---

**Input:** Hazard function of each state and each latent feature  $h_{0k}(\cdot), h_{1k}(\cdot), k = 1, \dots, K$ , constant hazard rates  $\Omega_{0k}, \Omega_{1k}$ , and initial state distribution  $\pi_0$ .

**Output:** A  $K$ -dimensional sMJP path  $\{\phi_k, \mathbf{s}_k(\phi_k)\}$

- 1: **while**  $k \in \{1, 2, \dots, K\}$  **do**
  - 2: Initialize  $l_0 = 0, i = 0, \tilde{\phi}_{k,0} = 0, \phi_k = \{\tilde{\phi}_{k,0}\}, \tilde{\mathbf{s}}_k(\tilde{\phi}_{k,0}) \sim \pi_0$ ,
  - 3: **while**  $\tilde{\phi}_{k,i} < T$  **do**
  - 4: increment  $i$
  - 5: Sample  $\Delta_i \sim H_{\tilde{\mathbf{s}}_k(\tilde{\phi}_{k,i-1}), k}(\cdot)$ . Set  $\tilde{\phi}_{k,i} = \tilde{\phi}_{k,i-1} + \Delta_i$ .
  - 6: Draw  $\delta \sim \text{Unif}(0, 1)$
  - 7: **if**  $\delta < \frac{h_{\tilde{\mathbf{s}}_k(\tilde{\phi}_{k,i-1}), k}(l_{i-1} + \Delta_i)}{h_{\tilde{\mathbf{s}}_k(\tilde{\phi}_{k,i-1}), k}(l_{i-1} + \Delta_i) + \Omega_{\tilde{\mathbf{s}}_k(\tilde{\phi}_{k,i-1}), k}}$  **then**
  - 8: Set  $l_i = 0, \tilde{\mathbf{s}}_k(\tilde{\phi}_{k,i}) = 1 - \tilde{\mathbf{s}}_k(\tilde{\phi}_{k,i-1}), \phi_k = \phi_k \cup \{\tilde{\phi}_{k,i}\}$
  - 9: **else**
  - 10: Set  $l_i = l_{i-1} + \Delta_i, \tilde{\mathbf{s}}_k(\tilde{\phi}_{k,i}) = \tilde{\mathbf{s}}_k(\tilde{\phi}_{k,i-1})$
  - 11: **end if**
  - 12: **end while**
  - 13:  $\phi_k = \phi_k \cup \{T\}, \{\phi_k, \mathbf{s}_k = \tilde{\mathbf{s}}_k(t), t \in \phi_k\}$  is a generated bsMJP path.
  - 14: **end while**
-
